# Supplementary material
Source: publisher site journal article supplement (https://www.dovepress.com/article/458102)
Supplement: Supplementary file 1 [file get_supplementary_file.php]

**Supplementary Tables**

**S-Table 1** Multiple linear regression analyses to assess the relationship between 25-hydroxyvitamin D (25(OH)D, nmol/l) and longitudinal change in body mass index (BMI, kg/m2) in patients with chronic obstructive pulmonary disease (COPD) and controls

|  | **Model 1** | | **Model 2** | |
| --- | --- | --- | --- | --- |
| **B (SE)** | **p-value** | **B (SE)** | **p-value** |
| 25(OH)D | -0.002  (0.003) | 0.525 | -0.003  (0.003) | 0.468 |
| Sex | -0.078  (0.173) | 0.655 | 0.016  (0.179) | 0.930 |
| Group | -0.090  (0.176) | 0.612 | -0.056  (0.176) | 0.753 |
| Age |  |  | -0.029  (0.013) | 0.029 |
| Smoking status |  |  | 0.256  (0.266) | 0.336 |
| BMI at baseline |  |  | -0.012  (0.021) | 0.577 |

Model 1, adjusted for sex (female vs male) and group (control vs COPD). Model 2, adjusted for sex (female vs male), group (control vs COPD) age (years), smoking status (former or non-smoker vs current smoker) and baseline value of BMI. **Abbreviations:** B, unstandardized B-coefficient. SE, standard error. Statistical significance was set at p < 0.05.

**S-Table 2** Multiple linear regression analyses to assess the relationship between 25-hydroxyvitamin D (25(OH)D, nmol/l) and longitudinal change in fat-free mass index (FFMI) in patients with chronic obstructive pulmonary disease (COPD) and controls

|  | **Model 1** | | **Model 2** | |
| --- | --- | --- | --- | --- |
| **B (SE)** | **p-value** | **B (SE)** | **p-value** |
| 25(OH)D | 0.002  (0.001) | 0.253 | 0.001  (0.001) | 0.337 |
| Sex | -0.221  (0.068) | 0.001 | 0.024  (0.105) | 0.822 |
| Group | -0.239  (0.069) | <0.001 | -0.265  (0.070) | <0.001 |
| Age |  |  | -0.010  (0.005) | 0.053 |
| Smoking status |  |  | 0.038  (0.102) | 0.709 |
| FFMI at baseline |  |  | -0.059  (0.022 | 0.007 |

Model 1, adjusted for sex (female vs male) and group (control vs COPD). Model 2, adjusted for sex (female vs male), group (control vs COPD) age (years), smoking status (former or non-smoker vs current smoker) and baseline value of FFMI. **Abbreviations:** B, unstandardized B-coefficient. SE, standard error. Statistical significance was set at p < 0.05.

**S-Table 3** Multiple linear regression analyses to assess the relationship between 25-hydroxyvitamin D (25(OH)D, nmol/l) and longitudinal change in fat mass index (FMI) in patients with chronic obstructive pulmonary disease (COPD) and controls

|  | **Model 1** | | **Model 2** | |
| --- | --- | --- | --- | --- |
| **B (SE)** | **p-value** | **B (SE)** | **p-value** |
| 25(OH)D | -0.003  (0.003) | 0.327 | -0.004  (0.003) | 0.251 |
| Sex | 0.191  (0.154) | 0.217 | 0.095  (0.164) | 0.562 |
| Group | 0.076  (0.157) | 0.630 | 0.120  (0.156) | 0.444 |
| Age |  |  | -0.014  (0.011) | 0.223 |
| Smoking status |  |  | 0.162  (0.234) | 0.491 |
| FMI at baseline |  |  | -0.067  (0.025) | 0.007 |

Model 1, adjusted for sex (female vs male) and group (control vs COPD). Model 2, adjusted for sex (female vs male), group (control vs COPD) age (years), smoking status (former or non-smoker vs current smoker) and baseline value of FMI. **Abbreviations:** B, unstandardized B-coefficient. SE, standard error. Statistical significance was set at p < 0.05.

**S-Table 4** Multiple linear regression analyses to assess the relationship between 25-hydroxyvitamin D (25(OH)D, nmol/l) and longitudinal change in T-score hip in patients with chronic obstructive pulmonary disease (COPD) and controls

|  | **Model 1** | | **Model 2** | |
| --- | --- | --- | --- | --- |
| **B (SE)** | **p-value** | **B (SE)** | **p-value** |
| 25(OH)D | -0.003  (0.001) | 0.014 | -0.001  (0.001) | 0.186 |
| Sex | 0.052  (0.056) | 0.352 | 0.131  (0.052) | 0.011 |
| Group | -0.038  (0.057) | 0.505 | -0.209  (0.054) | <0.001 |
| Age |  |  | -0.005  (0.004) | 0.195 |
| Smoking status |  |  | -0.128  (0.075 | 0.090 |
| T-score hip at baseline |  |  | -0.233  (0.025) | <0.001 |

Model 1, adjusted for sex (female vs male) and group (control vs COPD). Model 2, adjusted for sex (female vs male), group (control vs COPD) age (years), smoking status (former or non-smoker vs current smoker) and baseline value of T-score hip. Abbreviations: B, unstandardized B-coefficient. SE, standard error. Statistical significance was set at p < 0.05.

**S-Table 5** Multiple linear regression analyses to assess the relationship between 25-hydroxyvitamin d (25(OH)D, nmol/l) and longitudinal change in T-score lumbar spine in patients with chronic obstructive pulmonary disease (COPD) and controls

|  | **Model 1** | | **Model 2** | |
| --- | --- | --- | --- | --- |
| **BE (SE)** | **p-value** | **B (SE)** | **p-value** |
| 25(OH)D | -0.002  (0.001) | 0.145 | -0.001  (0.001) | 0.211 |
| Sex | 0.173  (0.053) | 0.001 | 0.178  (0.056) | 0.002 |
| Group | -0.013  (0.054) | 0.808 | -0.046  (0.056) | 0.416 |
| Age |  |  | 0.007  (0.004) | 0.073 |
| Smoking status |  |  | -0.130  (0.081) | 0.106 |
| T-score lumbar spine at baseline |  |  | -0.028  (0.017) | 0.107 |

Model 1, adjusted for sex (female vs male) and group (control vs COPD). Model 2, adjusted for sex (female vs male), group (control vs COPD) age (years), smoking status (former or non-smoker vs current smoker) and baseline value of T-score lumbar spine. **Abbreviations:** B, unstandardized B-coefficient. SE, standard error. Statistical significance was set at p < 0.05.

**S-Table 6****a and b** Multiple linear regression analyses to assess the relationship between 25-hydroxyvitamin D (25(OH)D, nmol/l) and longitudinal change in body mass index (BMI, kg/m2) in (6a) patients with chronic obstructive pulmonary disease (COPD) and (6b) controls, separately.

| **a. In patients with COPD** | | | | |
| --- | --- | --- | --- | --- |
|  | **Model 1** | | **Model 2** | |
| **B (SE)** | **p-value** | **B (SE)** | **p-value** |
| 25(OH)D | -0.012  (0.006) | 0.051 | -0.011  (0.006) | 0.063 |
| Sex | -0.032  (0.298) | 0.941 | 0.188  (0.319) | 0.577 |
| Age |  |  | -0.043  (0.022) | 0.053 |
| Smoking status |  |  | 0.033  (0.470) | 0.944 |
| BMI at baseline |  |  | -0.012  (0.031) | 0.699 |

| **b. In controls** | | | | |
| --- | --- | --- | --- | --- |
|  | **Model 1** | | **Model 2** | |
| **B (SE)** | **p-value** | **B (SE)** | **p-value** |
| 25(OH)D | 0.005  (0.004) | 0.169 | 0.005  (0.004) | 0.210 |
| Sex | -0.149  (0.197) | 0.451 | -0.114  (0.201) | 0.572 |
| Age |  |  | -0.015  (0.015) | 0.325 |
| Smoking status |  |  | 0.404  (0.299) | 0.178 |
| BMI at baseline |  |  | -0.019  (0.030) | 0.527 |

Model 1, adjusted for sex (female vs male). Model 2, adjusted for sex (female vs male), age (years), smoking status (former or non-smoker vs current smoker) and baseline value of BMI. Abbreviations: B, unstandardized B-coefficient. SE, Standard Error. Statistical significance was set at p < 0.05.
